# Supplementary material for: Evaluating potential predictors of weight loss response to liraglutide in adolescents with obesity: A post hoc analysis of the randomized, placebo-controlled SCALE Teens trial
Source: PubMed Central journal article supplement (PMC10926323; doi:10.1111/ijpo.13061), 2023-06-01
Supplement: NIHMS1967225-supplement-Supplement.pdf [file NIHMS1967225-supplement-Supplement.pdf]

## SUPPORTING INFORMATION

### Evaluating potential predictors of weight loss response to liraglutide in adolescents with obesity: A post-hoc analysis of the randomized, placebo-controlled SCALE Teens trial

Megan O. Bensignor,<sup>1</sup> Carolyn T. Bramante,<sup>1</sup> Eric M. Bomberg,<sup>1</sup> Claudia K. Fox,<sup>1</sup> Paula M. Hale,<sup>2</sup> Aaron S. Kelly,<sup>1</sup> Rashmi Mamadi,<sup>3</sup> Nandana Prabhu,<sup>4</sup> Nina M. Harder-Lauridsen,<sup>5</sup> Amy C. Gross<sup>1</sup>

<sup>1</sup>Department of Pediatrics, Center for Pediatric Obesity Medicine, University of Minnesota, Minneapolis, MN, USA; <sup>2</sup>Clinical Development, Medical & Regulatory Affairs, Novo Nordisk Inc., Plainsboro, NJ, USA; <sup>3</sup>Global Medical Affairs, Novo Nordisk, Bangalore, India; <sup>4</sup>Biostatistics, Novo Nordisk, Bangalore, India; <sup>5</sup>Medical and Science, Novo Nordisk A/S, Søborg, Denmark

#### Correspondence:

Megan Bensignor

Center for Pediatric Obesity Medicine, Department of Pediatrics, Medical School, University of Minnesota, 717 Delaware ST SE, Minneapolis, MN 55414, USA

Tel: 612-624-5409

Email: [moberle@umn.edu](mailto:moberle@umn.edu)

#### Contents

|                                                                                                                                                                       |   |
|-----------------------------------------------------------------------------------------------------------------------------------------------------------------------|---|
| <b>TABLE S1</b> Baseline characteristics of all trial participants randomized to liraglutide or placebo according to early responder status .....                     | 2 |
| <b>TABLE S2</b> Positive and negative predictive values for achieving $\geq 5\%$ and $\geq 10\%$ BMI reduction with placebo at week 56 by early responder status..... | 4 |

**TABLE S1** Baseline characteristics of all trial participants randomized to liraglutide or placebo according to early responder status

|                                         | <b>Liraglutide<br/>early responders<br/>(N = 64)</b> | <b>Liraglutide<br/>early non-responders<br/>(N = 55)</b> | <b>Placebo<br/>early responders<br/>(N = 18)</b> | <b>Placebo<br/>early non-responders<br/>(N = 105)</b> |
|-----------------------------------------|------------------------------------------------------|----------------------------------------------------------|--------------------------------------------------|-------------------------------------------------------|
| <b>Sex, n (%)</b>                       |                                                      |                                                          |                                                  |                                                       |
| <b>Female</b>                           | 38 (59.4)                                            | 28 (50.9)                                                | 10 (55.6)                                        | 67 (63.8)                                             |
| <b>Age, mean (SD), years</b>            | 14.6 (1.6)                                           | 14.6 (1.6)                                               | 14.7 (1.5)                                       | 14.5 (1.6)                                            |
| <b>Tanner stage,<sup>a</sup> n (%)</b>  |                                                      |                                                          |                                                  |                                                       |
| <b>2 or 3</b>                           | 12 (18.8)                                            | 10 (18.2)                                                | 3 (16.7)                                         | 17 (16.2)                                             |
| <b>4 or 5</b>                           | 52 (81.3)                                            | 45 (81.8)                                                | 15 (83.3)                                        | 88 (83.8)                                             |
| <b>Body weight, mean (SD), kg</b>       | 95.0 (16.8)                                          | 103.7 (22.2)                                             | 97.2 (16.3)                                      | 102.0 (21.0)                                          |
| <b>BMI, mean (SD), kg/m<sup>2</sup></b> | 34.1 (3.9)                                           | 36.6 (6.1)                                               | 34.1 (5.2)                                       | 35.9 (5.4)                                            |
| <b>BMI SDS, mean (SD)</b>               | 3.0 (0.5)                                            | 3.3 (0.8)                                                | 2.9 (0.7)                                        | 3.2 (0.7)                                             |
| <b>Glycemic status, n (%)</b>           |                                                      |                                                          |                                                  |                                                       |
| <b>Normoglycemia</b>                    | 50 (78.1)                                            | 37 (67.3)                                                | 13 (72.2)                                        | 78 (74.3)                                             |
| <b>Hyperglycemia<sup>b</sup></b>        | 14 (21.9)                                            | 18 (32.7)                                                | 5 (27.8)                                         | 27 (25.7)                                             |

*Note:* Early responders were participants who achieved  $\geq 4\%$  BMI reduction at week 16; early non-responders were participants who did not achieve  $\geq 4\%$  BMI reduction at week 16. Proportions may not total 100 because of rounding. Data are for participants with baseline and week 16 BMI assessments.

Abbreviations: BMI, body mass index; SD, standard deviation; SDS, standard deviation score.

<sup>a</sup>For each participant, Tanner stage was the maximum Tanner stage, calculated by combining the results for all categorical questions at the visit. Tanner stage 2 indicates early pubertal development, and stage 5, full maturity.

<sup>b</sup>Prediabetes (fasting plasma glucose 100 to  $\leq$ 125 mg/dL [5.6 to  $\leq$ 6.9 mmol/L] or glycated hemoglobin level 5.7 to  $\leq$ 6.4%) or type 2 diabetes (fasting plasma glucose  $\geq$ 126 mg/dL [ $\geq$ 7.0 mmol/L] and/or a glycated hemoglobin level  $\geq$ 6.5%).

**TABLE S2** Positive and negative predictive values for achieving  $\geq 5\%$  and  $\geq 10\%$  BMI reduction with placebo at week 56 by early responder status

| Placebo (N = 126)        |                    |                                               |                                                                          |                    |                                               |                                                                          |
|--------------------------|--------------------|-----------------------------------------------|--------------------------------------------------------------------------|--------------------|-----------------------------------------------|--------------------------------------------------------------------------|
| BMI reduction at week 56 | n (%) <sup>a</sup> | Early responders                              |                                                                          | n (%) <sup>a</sup> | Early non-responders                          |                                                                          |
|                          |                    | Positive predictive value, <sup>b</sup> n (%) | Mean BMI change at week 56 for positive predictive value, <sup>c</sup> % |                    | Negative predictive value, <sup>d</sup> n (%) | Mean BMI change at week 56 for negative predictive value, <sup>e</sup> % |
| $\geq 5\%$               | 18 (17.3)          | 9 (50.0)                                      | -16.8                                                                    | 86 (82.7)          | 76 (88.4)                                     | +3.8                                                                     |
| $\geq 10\%$              | 18 (17.3)          | 5 (27.8)                                      | -24.8                                                                    | 86 (82.7)          | 83 (96.5)                                     | +2.9                                                                     |

*Note:* Early responders were participants who achieved  $\geq 4\%$  BMI reduction at week 16; early non-responders were participants who did not achieve  $\geq 4\%$  BMI reduction at week 16. Data are observed (i.e., without imputation).

Abbreviations: BMI, body mass index.

<sup>a</sup>Proportions are based on the total number of participants included in the early responder analysis (i.e., those with baseline and week 16 BMI assessments) who also had a BMI measurement at week 56 ( $n = 104$ ).

<sup>b</sup>Early responders who achieved  $\geq 5\%$  or  $\geq 10\%$  (as applicable) BMI reduction at week 56.

<sup>c</sup>Mean change for early responders who achieved  $\geq 5\%$  or  $\geq 10\%$  (as applicable) BMI reduction at week 56.

<sup>d</sup>Early non-responders who did not achieve  $\geq 5\%$  or  $\geq 10\%$  (as applicable) BMI reduction at week 56.

<sup>e</sup>Mean change for early non-responders who did not achieve  $\geq 5\%$  or  $\geq 10\%$  (as applicable) BMI reduction at week 56.
